# Supplementary material for: Subcellular analysis of starch metabolism in developing barley seeds using a non-aqueous fractionation method
Source: PubMed Central journal article supplement — J Exp Bot. 2011 Dec 26;63(5):2071–87. doi: 10.1093/jxb/err408 (PMC3295393; doi:10.1093/jxb/err408), 2011-12-26
Supplement: supp_err408_Supplementary_Material.pdf [file supp_err408_Supplementary_Material.pdf]

# **Sub-cellular analysis of starch metabolism in developing barley seeds using a non-aqueous fractionation method**

*Axel Tiessen, Annika Nerlich, Benjamin Faix, Christine Hümmer, Simon Fox, Kay Trafford, Hans Weber, Winfriede Weschke, and Peter Geigenberger*

## **Supplementary Material**

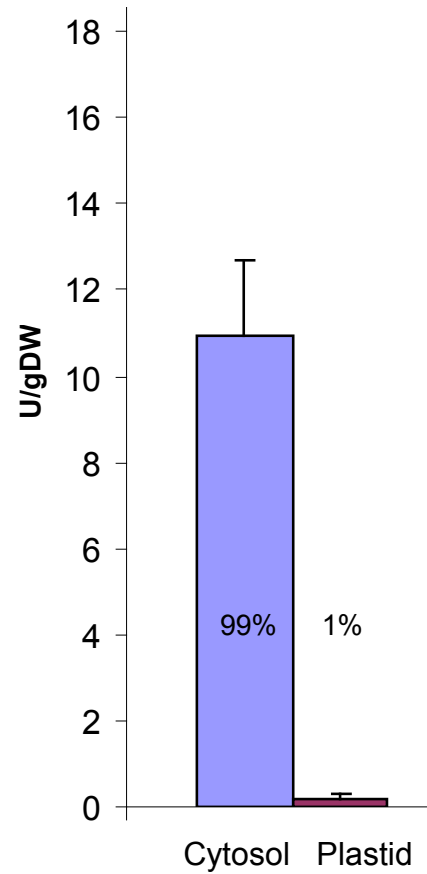

**Supplemental Figure S1**

Sub-cellular distribution of AGPase activity in developing barley endosperm (14DAF) as calculated from non-aqueous fractionation data. Results are the mean/SE ( $n = 3$  different experiments).
